# Supplementary material for: Impact of Empirical Antibiotic Therapy on Outcomes of Outpatient Urinary Tract Infection Due to Nonsusceptible Enterobacterales
Source: PubMed Central journal article supplement (PMC8826825; doi:10.1128/spectrum.02359-21), 2022-02-09
Supplement: spectrum02359-21_supp_1_seq4.pdf [file spectrum02359-21_supp_1_seq4.pdf]

1 Supplemental Table 1. 28-day Represcription and hospitalization rates by pathogen an antibiotic  
 2 received

| Antibiotic class /<br>Pathogen         | Frequency (%)    | Non-susceptible to class<br>N = 5395<br>% (n) | 28-day Represcription<br>n/N (%) |                              | Hospitalizations <sup>b</sup><br>n/N (%) |                            |
|----------------------------------------|------------------|-----------------------------------------------|----------------------------------|------------------------------|------------------------------------------|----------------------------|
|                                        |                  |                                               | Susceptible                      | Non-susceptible <sup>a</sup> | Susceptible                              | Non-susceptible            |
| <b>All Empiric Treatments Received</b> |                  |                                               |                                  |                              |                                          |                            |
| <b>Overall</b>                         |                  |                                               | <b>802/4237<br/>(18.9)</b>       | <b>397/1158<br/>(34.3)</b>   | <b>351/4237<br/>(8.3)</b>                | <b>176/1158<br/>(15.2)</b> |
| <i>Escherichia coli</i>                | 4,081<br>(75.6%) |                                               | 556/3197<br>(17.4%)              | 302/884<br>(34.2%)           | 218/3107<br>(7.0%)                       | 120/884<br>(13.6%)         |
| <i>Klebsiella pneumoniae</i>           | 733<br>(13.6%)   |                                               | 148/598<br>(24.7%)               | 51/135<br>(37.8%)            | 78/598<br>(13.0%)                        | 25/135<br>(18.5%)          |
| <i>Proteus mirabilis</i>               | 284<br>(5.3%)    |                                               | 45/214<br>(21.0%)                | 25/70<br>(35.7%)             | 22/214<br>(10.3%)                        | 15/70<br>(21.4%)           |
| Other <sup>c</sup>                     | 297<br>(5.5%)    |                                               | 53/228<br>(23.3%)                | 20/69<br>(29.0%)             | 28/228<br>(12.3%)                        | 16/69<br>(23.2%)           |
| <b>Fluoroquinolone</b>                 |                  |                                               |                                  |                              |                                          |                            |
| <b>Overall</b>                         | <b>100.0</b>     | <b>22.8<br/>(1232)</b>                        | <b>237/1483<br/>(16.0)</b>       | <b>140/390<br/>(35.9)</b>    | <b>130/1483<br/>(8.8)</b>                | <b>65/390<br/>(16.7)</b>   |

|                                      |              |                            |                           |                           |                     |                          |
|--------------------------------------|--------------|----------------------------|---------------------------|---------------------------|---------------------|--------------------------|
| <i>Escherichia coli</i>              | 70.7         | 27.2<br>(1,111)            | 126/979<br>(12.9)         | 128/345<br>(37.1)         | 59/979 (6.0)        | 53/345<br>(15.4)         |
| <i>Klebsiella pneumoniae</i>         | 16.2         | 6.8 (50)                   | 68/288<br>(23.6)          | 3/16 (18.8)               | 40/288<br>(13.9)    | 3/16 (18.8)              |
| <i>Proteus mirabilis</i>             | 5.5          | 18.7 (53)                  | 12/83 (14.5)              | 7/20 (35.0)               | 12/83 (14.5)        | 6/20 (30.0)              |
| Other <sup>c</sup>                   | 7.6          | 6.1 (18)                   | 31/133<br>(23.3)          | 2/9 (22.2)                | 19/133<br>(14.3)    | 3/9 (33.3)               |
| <b>ESBL+/β-lactam</b>                |              |                            |                           |                           |                     |                          |
| <b>ESBL+</b>                         | <b>100.0</b> | <b>6.6 (356)</b>           | <b>224/980<br/>(22.9)</b> | <b>91/329<br/>(27.7)</b>  | <b>81/980 (8.3)</b> | <b>48/329<br/>(14.6)</b> |
| <b>β-lactam</b>                      |              | <b>329/1309<br/>[25.1]</b> |                           |                           |                     |                          |
| <i>Escherichia coli</i>              | 76.1         | 7.4 (303)                  | 152/737<br>(20.6)         | 71/259 (27.4)             | 46/737 (6.2)        | 28/259<br>(10.8)         |
| <i>Klebsiella pneumoniae</i>         | 13.6         | 6.0 (44)                   | 48/149<br>(32.2)          | 11/29 (37.9)              | 22/149<br>(14.8)    | 8/29 (27.6)              |
| <i>Proteus mirabilis</i>             | 7.0          | 2.5 (7)                    | 21/79 (26.6)              | 2/12 (16.7)               | 11/79 (13.9)        | 3/12 (25.0)              |
| Other                                | 3.4          | 0.7 (2)                    | 3/15 (20.0)               | 7/29 (24.1)               | 2/15 (13.3)         | 9/29 (31.0)              |
| <b>Trimethoprim-sulfamethoxazole</b> |              |                            |                           |                           |                     |                          |
| <b>Overall</b>                       | <b>100.0</b> | <b>27.6<br/>(1491)</b>     | <b>134/753<br/>(17.8)</b> | <b>106/288<br/>(36.8)</b> | <b>71/753 (9.4)</b> | <b>45/288<br/>(15.6)</b> |

|                              |              |                   |                            |                          |                          |                          |
|------------------------------|--------------|-------------------|----------------------------|--------------------------|--------------------------|--------------------------|
| <i>Escherichia coli</i>      | 76.9         | 32.6<br>(1,330)   | 87/536<br>(16.2)           | 98/265 (37.0)            | 47/536 (8.8)             | 39/265<br>(14.7)         |
| <i>Klebsiella pneumoniae</i> | 11.9         | 12.6 (92)         | 21/112<br>(18.8)           | 5/12 (41.7)              | 13/112<br>(11.6)         | 2/12 (16.7)              |
| <i>Proteus mirabilis</i>     | 6.0          | 15.8 (45)         | 12/53 (22.6)               | 2/9 (22.2)               | 4/53 (7.5)               | 3/9 (33.3)               |
| Other                        | 5.2          | 8.1 (24)          | 14/52 (26.9)               | 1/2 (50.0)               | 7/52 (13.5)              | 1/2 (50.0)               |
| <b>Nitrofurantoin</b>        |              |                   |                            |                          |                          |                          |
| <b>Overall</b>               | <b>100.0</b> | <b>15.9 (857)</b> | <b>214/1055<br/>(20.3)</b> | <b>64/173<br/>(37.0)</b> | <b>73/1055<br/>(6.9)</b> | <b>23/173<br/>(13.3)</b> |
| <i>Escherichia coli</i>      | 81.7         | 3.4 (138)         | 197/971<br>(20.3)          | 9/32 (28.1)              | 66/971 (6.8)             | 5/32 (15.6)              |
| <i>Klebsiella pneumoniae</i> | 10.9         | 58.3 (427)        | 12/55 (21.8)               | 32/79 (40.5)             | 6/55 (10.9)              | 12/79 (15.2)             |
| <i>Proteus mirabilis</i>     | 2.6          | 53.5 (152)        | -                          | 13/32 (40.6)             | -                        | 3/32 (9.4)               |
| Other                        | 4.8          | 47.1 (140)        | 5/29 (17.2)                | 10/30 (33.3)             | 1/29 (3.4)               | 3/30 (10.0)              |
| <b>Fosfomycin</b>            |              |                   |                            |                          |                          |                          |
| <b>Overall</b>               | <b>N/A</b>   | <b>N/A</b>        | <b>0/1 (0.0)</b>           | <b>-</b>                 | <b>0/1 (0.0)</b>         | <b>-</b>                 |
| <i>Klebsiella pneumoniae</i> | N/A          | N/A               | 0/1 (0.0)                  | -                        | 0/1 (0.0)                | -                        |
